# Supplementary material for: Basic color categories in Mandarin Chinese revealed by cluster analysis
Source: PubMed Central journal article supplement — J Vis. 2020 Nov 16;20(12):6. doi: 10.1167/jov.20.12.6 (PMC7671860; doi:10.1167/jov.20.12.6), 2020-11-16
Supplement: jovi-20-12-6_s002.pdf [file jovi-20-12-6_s002.pdf]

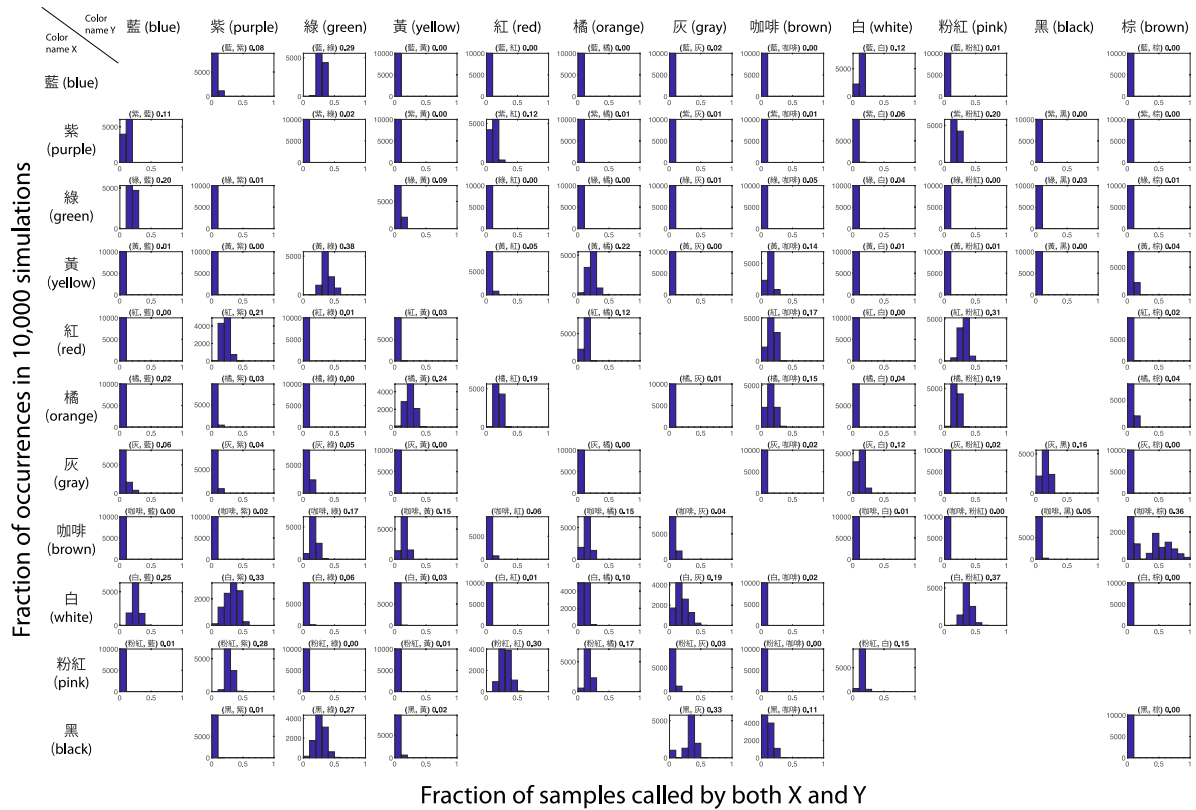

**Supplementary Figure S2.** Overlapping ratios for all pairs of color terms in TMC data. The overlapping ratio was defined based on the average proportion of all color chips named once by a participant by a color term X (in row) that was also named at least once by a color term Y (in column) among other participants. The data of 10 participants were randomly resampled ( $N = 10$ ) 10,000 times to derive the histogram of overlapping ratios. Color-name pairs are shown in parentheses as (X, Y) on top of each plot. Median values are also shown at the top of each panel.
