# Supplementary figures and images for: Basic color categories in Mandarin Chinese revealed by cluster analysis
Source: PubMed Central journal article supplement — J Vis. 2020 Nov 16;20(12):6. doi: 10.1167/jov.20.12.6 (PMC7671860; doi:10.1167/jov.20.12.6), 2020-11-16

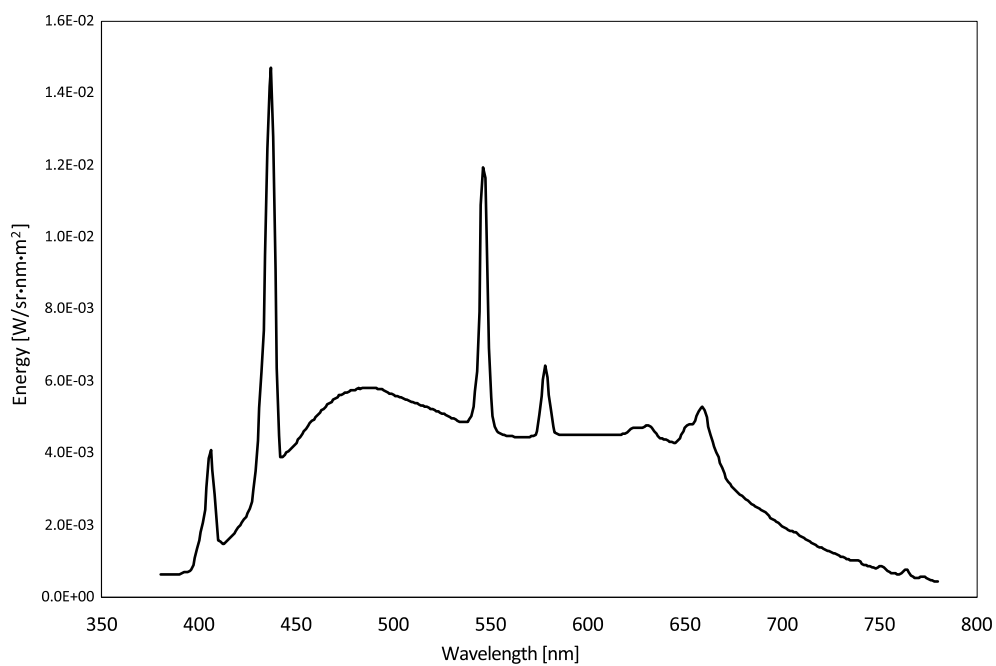

**Supplementary Figure S1.** Energy spectrum of VeriVide65 lamp used in the experiment.

Supplement: jovi-20-12-6_s001.pdf [file jovi-20-12-6_s001.pdf]
